# Supplementary material
Source: PubMed Central journal article supplement (PMC5794414)
Supplement: 10.1194_M077222_jlr.M077222-1.pdf [file 10.1194_M077222_jlr.M077222-1.pdf]

## Supplemental Material

### Shared and distinct lipid-lipid interactions in plasma and affected tissues in a diabetic mouse model

#### Authors:

Kelli M. Sas<sup>1</sup>, Jiahe Lin<sup>2</sup>, Thekkelnaycke M. Rajendiran<sup>3,4</sup>, Tanu Soni<sup>4</sup>, Viji Nair<sup>1,5</sup>, Lucy M. Hinder<sup>6</sup>, Hosagrahar V. Jagadish<sup>7</sup>, Thomas W. Gardner<sup>8</sup>, Steven F. Abcouwer<sup>8</sup>, Frank C. Brosius III<sup>1</sup>, Eva L. Feldman<sup>6</sup>, Matthias Kretzler<sup>1,5</sup>, George Michailidis<sup>9</sup>, Subramaniam Pennathur<sup>1,4,5</sup>

#### Affiliations:

<sup>1</sup>Division of Nephrology, Department of Internal Medicine, <sup>2</sup>Department of Statistics, <sup>3</sup>Department of Pathology, University of Michigan, Ann Arbor, Michigan 48109, USA; <sup>4</sup>Michigan Regional Comprehensive Metabolomics Resource Core, Ann Arbor, Michigan 48105, USA; <sup>5</sup>Department of Computational Medicine and Bioinformatics, <sup>6</sup>Department of Neurology, <sup>7</sup>Department of Electrical Engineering and Computer Science, <sup>8</sup>Department of Ophthalmology and Visual Sciences, University of Michigan, Ann Arbor, Michigan 48109, USA; <sup>9</sup>Department of Statistics and Computer and Information Sciences, University of Florida, Gainesville, Florida 32611, USA.

#### Journal:

Journal of Lipid Research

**Supplemental Table S1: Significantly different lipid features in between control and diabetic mouse plasma**

| Lipid Name        | P value  | Mean Change ( <i>db/db</i> ) |
|-------------------|----------|------------------------------|
| PC 42:6           | 3.94E-13 | -1.92464                     |
| lysoPC 20:0       | 1.17E-11 | -1.91035                     |
| SM 36:1           | 2.02E-08 | 1.85480                      |
| SM 42:1           | 4.36E-08 | -1.84277                     |
| PC 42:7           | 5.66E-08 | -1.83674                     |
| PC 38:1           | 1.19E-07 | -1.82290                     |
| PC 44:7           | 1.19E-07 | -1.82201                     |
| PC 38:2           | 1.78E-07 | -1.81394                     |
| PC 40:3           | 2.15E-07 | -1.80737                     |
| PC 42:5           | 2.15E-07 | -1.80755                     |
| PC 40:2           | 8.19E-07 | -1.78063                     |
| PC 44:9           | 8.19E-07 | -1.78033                     |
| lysoPC 20:1       | 8.25E-07 | -1.77860                     |
| PC 38:3           | 8.64E-07 | 1.77623                      |
| lysoPC 22:1       | 9.32E-07 | -1.77331                     |
| PC 44:6           | 1.00E-06 | -1.77047                     |
| SM 36:2           | 1.71E-06 | 1.75780                      |
| SM 40:2           | 2.41E-06 | -1.74861                     |
| SM 36:0           | 2.65E-06 | 1.74517                      |
| Plasmenyl-PC 20:0 | 3.27E-06 | -1.73790                     |
| Plasmenyl-PE 38:6 | 3.27E-06 | -1.73760                     |
| PC 30:0           | 5.67E-06 | -1.72235                     |
| PC 46:7           | 5.72E-06 | -1.71997                     |
| Plasmenyl-PE 40:3 | 5.72E-06 | 1.71981                      |
| PC 42:3           | 7.56E-06 | -1.71108                     |
| lysoPC 24:1       | 8.07E-06 | -1.70812                     |
| SM 38:5           | 8.08E-06 | 1.70701                      |
| PC 40:6           | 1.01E-05 | 1.69850                      |
| SM 40:1           | 1.01E-05 | -1.69938                     |
| Plasmenyl-PE 34:2 | 2.18E-05 | -1.67356                     |
| lysoPC 22:5       | 2.66E-05 | -1.66490                     |
| PC 32:3           | 2.66E-05 | -1.66545                     |
| CL 80:11          | 2.70E-05 | -1.66333                     |
| Plasmenyl-PE 42:0 | 2.92E-05 | 1.65958                      |
| lysoPE 20:4       | 3.11E-05 | 1.65645                      |
| PE 38:4           | 3.26E-05 | 1.65378                      |
| Plasmenyl-PC 24:0 | 4.70E-05 | -1.63961                     |
| Plasmenyl-PE 34:1 | 4.99E-05 | -1.63642                     |
| SM 40:5           | 5.26E-05 | 1.63346                      |
| lysoPC 24:0       | 5.54E-05 | -1.63054                     |
| TAG 64:13         | 5.80E-05 | -1.62787                     |
| lysoPC 22:4       | 7.34E-05 | -1.61685                     |
| PE 38:3           | 7.34E-05 | 1.61621                      |
| Plasmenyl-PE 38:5 | 7.34E-05 | -1.61587                     |
| lysoPC 18:0       | 8.82E-05 | 1.60749                      |

| Lipid Name        | P value    | Mean Change ( <i>db/db</i> ) |
|-------------------|------------|------------------------------|
| lysoPE 20:2       | 0.00010165 | -1.60068                     |
| PC 32:0           | 0.00010214 | -1.59957                     |
| MAG 18:3          | 0.00010844 | 1.59615                      |
| PC 22:2           | 0.00011018 | -1.59442                     |
| PC 36:4           | 0.00011018 | 1.59372                      |
| PC 42:1           | 0.0001496  | -1.57945                     |
| Plasmenyl-PC 38:5 | 0.00015274 | -1.57764                     |
| PC 36:2           | 0.00019936 | -1.56454                     |
| Plasmenyl-PE 36:5 | 0.00022859 | -1.55719                     |
| lysoPC 20:2       | 0.00023031 | -1.55595                     |
| PI 34:2           | 0.00025426 | -1.55030                     |
| Plasmenyl-PE 36:3 | 0.00029594 | -1.54195                     |
| lysoPC 26:1       | 0.00030663 | -1.53931                     |
| PC 44:3           | 0.00034626 | -1.53229                     |
| CL 82:7           | 0.00034881 | 1.53091                      |
| PE 40:3           | 0.00034881 | 1.53020                      |
| lysoPC 22:6       | 0.00042454 | -1.51910                     |
| Plasmenyl-PC 38:0 | 0.00042725 | 1.51767                      |
| SM 34:1           | 0.00042725 | 1.51708                      |
| lysoPC 14:0       | 0.00051163 | -1.50651                     |
| CL 78:5           | 0.00062182 | 1.49484                      |
| PC 42:2           | 0.00062601 | -1.49362                     |
| PI 40:4           | 0.00093155 | -1.46964                     |
| PE 40:4           | 0.00098133 | 1.46517                      |
| Plasmenyl-PE 38:3 | 0.00098133 | 1.46432                      |
| SM 38:2           | 0.00098133 | 1.46390                      |
| lysoPC 22:0       | 0.00101204 | -1.46117                     |
| Plasmenyl-PC 40:5 | 0.00104655 | -1.45828                     |
| CL 82:3           | 0.0010903  | -1.45491                     |
| PC 46:6           | 0.00113471 | -1.45159                     |
| PI 38:6           | 0.00163812 | -1.42631                     |
| TAG 62:8          | 0.00163812 | -1.42692                     |
| lysoPE 18:0       | 0.00163912 | 1.42542                      |
| PI 38:4           | 0.00171403 | 1.42160                      |
| TAG 64:12         | 0.00218313 | -1.40428                     |
| PC 42:8           | 0.00250443 | -1.39292                     |
| SM 38:4           | 0.00250443 | 1.39296                      |
| lysoPE 20:1       | 0.00304066 | -1.37805                     |
| CE 16:1           | 0.00308553 | -1.37610                     |
| PC 32:1           | 0.00308913 | -1.37514                     |
| TAG 54:4          | 0.00340292 | 1.36709                      |
| CL 82:15          | 0.00356956 | 1.36262                      |
| PE 36:4           | 0.00357241 | 1.36169                      |
| SM 38:1           | 0.00359285 | 1.36041                      |
| TAG 58:9          | 0.00371073 | 1.35710                      |
| TAG 64:14         | 0.00396967 | -1.35106                     |
| Plasmenyl-PC 44:4 | 0.00399287 | -1.34976                     |
| DAG 36:3          | 0.00430236 | 1.34309                      |

| Lipid Name        | P value    | Mean Change ( <i>db/db</i> ) |
|-------------------|------------|------------------------------|
| lysoPC 20:3       | 0.00459934 | -1.33697                     |
| DAG 40:6          | 0.00462446 | 1.33403                      |
| PE 40:2           | 0.00462446 | -1.33555                     |
| PE 42:7           | 0.00462446 | -1.33443                     |
| PC 40:8           | 0.00483639 | 1.32961                      |
| PC 44:5           | 0.00493647 | -1.32713                     |
| PE 36:2           | 0.0053378  | 1.31994                      |
| PE 38:5           | 0.00536936 | 1.31863                      |
| PE 40:1           | 0.00538177 | -1.31763                     |
| CL 76:5           | 0.00561198 | 1.31335                      |
| PC 32:2           | 0.00576788 | -1.31007                     |
| Plasmenyl-PE 40:4 | 0.00576788 | 1.30946                      |
| PC 38:5           | 0.0059273  | 1.30637                      |
| CL 76:7           | 0.00617162 | 1.30204                      |
| CL 82:11          | 0.00617162 | 1.30058                      |
| MAG 18:2          | 0.00617162 | 1.30100                      |
| DAG 38:6          | 0.00622492 | 1.29907                      |
| TAG 54:3          | 0.00657623 | 1.29357                      |
| TAG 58:8          | 0.00686564 | 1.28906                      |
| PA 36:2           | 0.0072227  | -1.28385                     |
| DAG 36:4          | 0.00758699 | 1.27868                      |
| PC 42:4           | 0.00758699 | -1.27795                     |
| PC 40:0           | 0.00759795 | -1.27651                     |
| Plasmenyl-PE 42:5 | 0.00759795 | 1.27553                      |
| TAG 62:7          | 0.00759795 | -1.27596                     |
| CL 78:8           | 0.00769641 | 1.27362                      |
| Plasmenyl-PE 38:2 | 0.00793454 | 1.27013                      |
| CE 18:0           | 0.00802506 | 1.26836                      |
| Plasmenyl-PC 22:0 | 0.008128   | -1.26646                     |
| PC 34:5           | 0.00833598 | -1.26342                     |
| DAG 34:2          | 0.00835529 | 1.26247                      |
| CerP 42:2         | 0.00872469 | -1.25703                     |
| TAG 60:7          | 0.00872469 | -1.25744                     |
| DAG 38:5          | 0.00892688 | 1.25400                      |
| Plasmenyl-PC 40:3 | 0.00892688 | 1.25345                      |
| DAG 40:8          | 0.00896304 | 1.25235                      |
| lysoPC 18:1       | 0.00920821 | -1.24840                     |
| TAG 58:10         | 0.00920821 | 1.24860                      |
| TAG 54:5          | 0.00989517 | 1.24090                      |
| Plasmenyl-PE 38:4 | 0.00996146 | 1.23954                      |

Value given as mean difference in 24-week-old *db/db* versus *db/+*. CE = cholesterol ester, CerP = ceramide-1-phosphate, CL = cardiolipin, DAG = diacylglycerol, MAG = monoacylglycerol, PA = phosphatidic acid, PC = phosphatidylcholine, PE = phosphatidylethanolamine, PI = phosphatidylinositol, SM = sphingomyelin, TAG = triacylglycerol.  $P < 0.01$  based on a two-sample t-test with FDR correction,  $n = 10$ /group. Related to Figure 1.

**Supplemental Table S2: Significantly different lipid features in between control and diabetic mouse kidney**

| Lipid Name        | P value  | Mean Change ( <i>db/db</i> ) |
|-------------------|----------|------------------------------|
| Plasmenyl-PE 36:4 | 6.92E-08 | 1.85568                      |
| PE 38:5           | 7.13E-08 | 1.84768                      |
| PC 40:6           | 5.37E-07 | -1.81532                     |
| PC 22:3           | 1.77E-06 | -1.78638                     |
| Plasmenyl-PE 34:1 | 1.77E-06 | 1.7904                       |
| lysoPC 20:0       | 2.22E-06 | -1.77547                     |
| PC 22:1           | 2.22E-06 | -1.77815                     |
| PC 22:0           | 2.72E-06 | -1.76857                     |
| CL 84:13          | 2.99E-06 | -1.76185                     |
| PG 32:0           | 2.99E-06 | -1.76195                     |
| PC 30:4           | 3.46E-06 | -1.75648                     |
| PC 20:0           | 3.50E-06 | -1.75431                     |
| PG 38:6           | 3.70E-06 | -1.75121                     |
| lysoPE 22:6       | 4.17E-06 | -1.7467                      |
| SM 40:5           | 5.32E-06 | -1.73916                     |
| PC 24:0           | 5.91E-06 | -1.73308                     |
| PG 40:5           | 5.91E-06 | -1.73203                     |
| Plasmenyl-PE 38:4 | 5.91E-06 | 1.73328                      |
| PC 28:1           | 6.03E-06 | -1.72795                     |
| PC 28:3           | 6.03E-06 | -1.72859                     |
| PC 32:5           | 6.03E-06 | -1.72757                     |
| PC 24:2           | 6.12E-06 | -1.72597                     |
| PE 40:8           | 6.59E-06 | 1.72285                      |
| CL 84:14          | 9.01E-06 | -1.71296                     |
| SM 36:2           | 9.01E-06 | 1.71211                      |
| MAG 18:3          | 9.58E-06 | 1.70932                      |
| CL 70:4           | 1.09E-05 | 1.70352                      |
| Plasmenyl-PE 38:5 | 1.09E-05 | 1.70359                      |
| PE 30:0           | 1.10E-05 | -1.70228                     |
| DAG 30:6          | 1.12E-05 | 1.69989                      |
| lysoPC 18:1       | 1.12E-05 | 1.69973                      |
| PG 30:0           | 1.19E-05 | -1.6971                      |
| SM 40:2           | 1.24E-05 | 1.69489                      |
| PS 36:4           | 1.75E-05 | 1.68342                      |
| PE 30:1           | 1.91E-05 | -1.67979                     |
| PC 30:6           | 2.00E-05 | -1.67739                     |
| PC 26:0           | 2.07E-05 | -1.67546                     |
| Plasmenyl-PC 18:0 | 2.07E-05 | 1.67447                      |
| PC 36:8           | 2.11E-05 | -1.67308                     |
| CL 72:5           | 2.17E-05 | 1.67127                      |
| PC 26:3           | 3.12E-05 | -1.65576                     |
| PG 34:1           | 3.12E-05 | 1.65605                      |
| PI 38:0           | 3.12E-05 | -1.65742                     |
| SM 36:1           | 3.12E-05 | 1.6558                       |
| Plasmenyl-PE 38:3 | 3.32E-05 | 1.65278                      |

| Lipid Name        | P value     | Mean Change (db/db) |
|-------------------|-------------|---------------------|
| lysoPC 18:2       | 3.79E-05    | 1.64733             |
| PC 34:1           | 4.34E-05    | 1.64164             |
| CL 80:9           | 4.38E-05    | -1.63978            |
| PC 28:2           | 4.38E-05    | -1.63981            |
| CL 76:9           | 5.71E-05    | 1.62903             |
| Plasmenyl-PE 32:0 | 6.46E-05    | -1.62348            |
| PE 40:9           | 9.36E-05    | 1.60786             |
| CL 72:6           | 9.37E-05    | 1.60707             |
| PC 18:0           | 0.000128061 | -1.59312            |
| PE 22:1           | 0.000143305 | -1.58745            |
| PS 34:2           | 0.00019132  | 1.57375             |
| PC 20:1           | 0.000258821 | -1.55803            |
| PC 42:10          | 0.000258821 | 1.55856             |
| PA 36:2           | 0.00028417  | 1.55273             |
| SM 36:0           | 0.000286523 | 1.55151             |
| DAG 38:5          | 0.000290384 | 1.55006             |
| Plasmenyl-PE 42:6 | 0.00031589  | -1.54513            |
| lysoPE 18:1       | 0.000334495 | 1.54141             |
| Plasmenyl-PE 36:2 | 0.000334495 | 1.54071             |
| CL 78:8           | 0.000385124 | 1.5328              |
| CL 78:4           | 0.000431274 | 1.5254              |
| SM 38:2           | 0.000431274 | 1.52589             |
| DAG 42:8          | 0.000437997 | 1.52382             |
| PC 38:0           | 0.000455938 | 1.52095             |
| PA 38:5           | 0.00051163  | -1.51406            |
| CL 80:7           | 0.000670036 | -1.49852            |
| CL 74:5           | 0.000725876 | 1.49324             |
| CL 70:6           | 0.000792391 | 1.48673             |
| PE 20:1           | 0.000792391 | -1.48668            |
| PA 38:3           | 0.00080971  | 1.48466             |
| PC 36:4           | 0.000914604 | -1.47679            |
| CL 84:11          | 0.000985927 | -1.47157            |
| PG 42:7           | 0.001057635 | -1.46659            |
| PE 46:6           | 0.001155486 | -1.46044            |
| PE 20:0           | 0.001171605 | -1.45806            |
| SM 42:4           | 0.001171605 | 1.45863             |
| lysoPC 18:0       | 0.001293516 | 1.45116             |
| PE 24:6           | 0.001363825 | -1.44708            |
| PA 38:2           | 0.001473412 | 1.44141             |
| PE 40:6           | 0.001557109 | -1.4371             |
| DAG 26:1          | 0.001607046 | -1.4343             |
| CE 18:1           | 0.001712551 | 1.42858             |
| PC 34:5           | 0.001712551 | -1.4279             |
| PS 36:2           | 0.001712551 | 1.42866             |
| CL 74:4           | 0.001894674 | 1.41971             |
| CL 76:3           | 0.001894674 | -1.42017            |
| CL 80:11          | 0.002013761 | -1.41413            |
| DAG 40:7          | 0.002013761 | 1.41473             |

| Lipid Name        | P value     | Mean Change (db/db) |
|-------------------|-------------|---------------------|
| PI 34:2           | 0.002075818 | 1.41134             |
| DAG 36:1          | 0.002181429 | 1.40651             |
| Plasmenyl-PE 34:2 | 0.002181429 | 1.40648             |
| lysoPC 26:0       | 0.002249844 | -1.40363            |
| CL 74:7           | 0.002371661 | 1.39843             |
| DAG 40:8          | 0.002371661 | 1.39782             |
| PA 28:4           | 0.002371661 | 1.39783             |
| CL 72:2           | 0.002603337 | 1.39051             |
| PC 38:5           | 0.002763535 | -1.38552            |
| DAG 40:5          | 0.002904574 | 1.38121             |
| TAG 56:7          | 0.002942141 | 1.37957             |
| SM 42:5           | 0.003057463 | 1.37605             |
| CL 80:13          | 0.003136642 | -1.37347            |
| PG 36:1           | 0.003158504 | -1.37226            |
| PC 28:0           | 0.003226254 | -1.36999            |
| PE 34:2           | 0.003281669 | 1.36803             |
| DAG 44:12         | 0.003384505 | 1.36503             |
| PE 36:4           | 0.003411991 | 1.36374             |
| Plasmenyl-PC 20:0 | 0.003544161 | 1.36019             |
| PE 22:2           | 0.003568379 | -1.35899            |
| lysoPC 22:0       | 0.003744823 | -1.35463            |
| PA 40:2           | 0.003846549 | -1.35141            |
| PE 42:6           | 0.003846549 | -1.35123            |
| PC 30:0           | 0.00389019  | 1.34848             |
| PC 32:4           | 0.00389019  | -1.34936            |
| PC 48:6           | 0.00389019  | -1.34837            |
| PS 38:5           | 0.003894242 | 1.34764             |
| PI 40:6           | 0.004152704 | -1.34196            |
| CL 68:2           | 0.004278136 | 1.33896             |
| lysoPE 20:5       | 0.004478752 | -1.33466            |
| TAG 60:8          | 0.004860414 | 1.32743             |
| SM 38:1           | 0.004943341 | 1.32541             |
| DAG 42:6          | 0.005057641 | 1.3229              |
| PS 40:7           | 0.005571147 | 1.31428             |
| PA 36:1           | 0.005820718 | 1.30997             |
| MAG 18:4          | 0.006326456 | 1.30229             |
| CL 72:8           | 0.006450182 | 1.29961             |
| DAG 42:10         | 0.006450182 | 1.29868             |
| TAG 58:9          | 0.006450182 | 1.29918             |
| CL 76:6           | 0.006670464 | 1.29515             |
| DAG 38:4          | 0.006670481 | 1.2945              |
| Plasmenyl-PE 36:0 | 0.006670481 | -1.29345            |
| TAG 58:10         | 0.006670481 | 1.29323             |
| PE 38:4           | 0.006747928 | 1.29159             |
| DAG 36:4          | 0.006831171 | 1.2899              |
| CL 80:16          | 0.006926106 | -1.28807            |
| DAG 34:2          | 0.006959525 | 1.28702             |
| PC 40:8           | 0.006977652 | 1.28617             |

| Lipid Name | P value     | Mean Change ( <i>db/db</i> ) |
|------------|-------------|------------------------------|
| PG 42:11   | 0.007485171 | -1.27937                     |
| CL 78:5    | 0.007763837 | 1.27549                      |
| PE 42:4    | 0.008092702 | 1.27115                      |
| PC 40:9    | 0.008126464 | 1.27015                      |
| SM 40:1    | 0.008363943 | 1.26693                      |
| DAG 42:7   | 0.008445594 | 1.26543                      |
| CL 82:13   | 0.009355705 | -1.2548                      |
| TAG 62:13  | 0.009355705 | 1.25506                      |
| TAG 62:14  | 0.009439657 | 1.25335                      |
| TAG 64:9   | 0.009722039 | 1.24998                      |
| PE 36:3    | 0.009917738 | 1.2466                       |
| PG 42:8    | 0.009917738 | -1.24668                     |
| PI 38:3    | 0.009917738 | -1.24627                     |
| PC 44:12   | 0.009940639 | 1.24545                      |

Value given as mean difference in 24-week-old *db/db* versus *db/+*. CE = cholesterol ester, CL = cardiolipin, DAG = diacylglycerol, MAG = monoacylglycerol, PA = phosphatidic acid, PC = phosphatidylcholine, PE = phosphatidylethanolamine, PG = phosphatidylglycerol, PI = phosphatidylinositol, PS = phosphatidylserine, SM = sphingomyelin, TAG = triacylglycerol.  $P < 0.01$  based on a two-sample t-test with FDR correction,  $n = 10/\text{group}$ . Related to Figure 1.



**Supplemental Table S3: Significantly different lipid features in between control and diabetic mouse nerve**

| Lipid Name        | P value  | Mean Change ( <i>db/db</i> ) |
|-------------------|----------|------------------------------|
| DAG 36:2          | 4.39E-17 | 1.93969                      |
| DAG 36:3          | 4.39E-17 | 1.93972                      |
| DAG 34:2          | 9.49E-16 | 1.93512                      |
| DAG 34:1          | 3.90E-15 | 1.93214                      |
| TAG 54:2          | 8.29E-14 | 1.92454                      |
| TAG 54:1          | 1.01E-13 | 1.92346                      |
| PC 34:0           | 1.15E-13 | 1.92262                      |
| TAG 54:7          | 1.37E-13 | 1.92168                      |
| DAG 34:0          | 5.28E-13 | 1.91676                      |
| TAG 52:1          | 1.42E-12 | 1.91250                      |
| Plasmenyl-PE 36:3 | 2.24E-12 | 1.91017                      |
| TAG 54:8          | 3.64E-12 | 1.90757                      |
| Plasmenyl-PE 36:4 | 4.03E-12 | 1.90670                      |
| TAG 58:10         | 1.06E-11 | 1.90140                      |
| TAG 52:6          | 1.47E-11 | 1.89923                      |
| DAG 32:0          | 6.12E-11 | 1.89010                      |
| Plasmenyl-PE 40:5 | 6.43E-11 | 1.88936                      |
| TAG 54:6          | 9.35E-11 | 1.88637                      |
| TAG 56:6          | 9.94E-11 | 1.88555                      |
| TAG 52:2          | 1.94E-10 | 1.88015                      |
| Plasmenyl-PE 38:5 | 2.36E-10 | 1.87822                      |
| PC 40:7           | 3.53E-10 | 1.87452                      |
| TAG 58:2          | 3.77E-10 | 1.87358                      |
| TAG 56:2          | 6.95E-10 | 1.86740                      |
| TAG 52:0          | 6.95E-10 | 1.86758                      |
| PC 46:6           | 8.17E-10 | 1.86551                      |
| Plasmenyl-PE 38:6 | 1.73E-09 | 1.85769                      |
| PC 38:6           | 1.82E-09 | 1.85675                      |
| TAG 54:5          | 2.43E-09 | 1.85330                      |
| PS 36:3           | 3.25E-09 | 1.84971                      |
| TAG 56:7          | 4.05E-09 | 1.84682                      |
| PS 40:7           | 4.05E-09 | 1.84644                      |
| PE 40:5           | 4.24E-09 | 1.84555                      |
| DAG 32:1          | 4.82E-09 | 1.84331                      |
| TAG 58:9          | 4.82E-09 | 1.84359                      |
| SM 42:2           | 4.85E-09 | 1.84289                      |
| DAG 34:3          | 7.30E-09 | 1.83749                      |
| PE 42:10          | 8.52E-09 | 1.83514                      |
| Plasmenyl-PE 34:2 | 8.88E-09 | 1.83427                      |
| PC 40:1           | 9.81E-09 | 1.83229                      |
| TAG 56:1          | 9.81E-09 | 1.83247                      |
| DAG 36:1          | 1.04E-08 | 1.83055                      |
| DAG 40:6          | 1.04E-08 | 1.83070                      |
| TAG 52:7          | 1.04E-08 | 1.83091                      |
| DAG 36:4          | 1.07E-08 | 1.82958                      |

| Lipid Name        | P value  | Mean Change (db/db) |
|-------------------|----------|---------------------|
| PC 36:1           | 1.07E-08 | 1.82958             |
| PC 42:1           | 1.12E-08 | 1.82862             |
| PS 40:5           | 1.39E-08 | 1.82536             |
| PC 44:6           | 1.57E-08 | 1.82327             |
| TAG 56:9          | 1.65E-08 | 1.82232             |
| TAG 58:3          | 1.86E-08 | 1.82026             |
| TAG 54:3          | 1.97E-08 | 1.81913             |
| PC 36:4           | 2.25E-08 | 1.81681             |
| Plasmenyl-PE 34:3 | 2.41E-08 | 1.81553             |
| TAG 58:4          | 2.96E-08 | 1.81117             |
| PE 38:1           | 2.96E-08 | 1.81132             |
| TAG 58:12         | 2.96E-08 | 1.81133             |
| TAG 56:8          | 2.96E-08 | 1.81164             |
| PE 36:1           | 3.04E-08 | 1.81050             |
| TAG 56:5          | 3.13E-08 | 1.80979             |
| PE 36:3           | 3.31E-08 | 1.80859             |
| PE 40:6           | 3.32E-08 | 1.80829             |
| TAG 60:11         | 3.81E-08 | 1.80580             |
| TAG 52:3          | 4.04E-08 | 1.80455             |
| SM 34:1           | 5.63E-08 | 1.79867             |
| PE 44:12          | 5.68E-08 | 1.79825             |
| PC 42:3           | 5.73E-08 | 1.79732             |
| PS 40:6           | 5.73E-08 | 1.79742             |
| PE 38:6           | 5.73E-08 | 1.79752             |
| DAG 38:6          | 5.83E-08 | 1.79678             |
| TAG 52:5          | 6.45E-08 | 1.79473             |
| SM 36:1           | 6.58E-08 | 1.79415             |
| DAG 36:5          | 7.84E-08 | 1.79074             |
| TAG 58:8          | 8.58E-08 | 1.78883             |
| lysoPE 18:1       | 8.78E-08 | -1.78815            |
| PE 36:2           | 1.13E-07 | 1.78316             |
| lysoPE 22:4       | 1.20E-07 | -1.78177            |
| TAG 58:11         | 1.36E-07 | 1.77912             |
| PE 40:7           | 1.39E-07 | 1.77833             |
| PC 40:2           | 1.41E-07 | 1.77764             |
| TAG 56:10         | 1.41E-07 | 1.77765             |
| PE 34:2           | 1.60E-07 | 1.77486             |
| PE 38:4           | 2.07E-07 | 1.76933             |
| PC 40:10          | 2.09E-07 | 1.76882             |
| PS 34:2           | 2.22E-07 | 1.76733             |
| TAG 50:5          | 3.11E-07 | 1.75985             |
| TAG 60:5          | 3.21E-07 | 1.75889             |
| SM 42:4           | 3.24E-07 | 1.75846             |
| TAG 58:0          | 4.00E-07 | 1.75344             |
| TAG 54:4          | 4.44E-07 | 1.75083             |
| PC 34:4           | 4.47E-07 | 1.75041             |
| DAG 44:12         | 5.58E-07 | 1.74496             |
| TAG 60:13         | 6.16E-07 | 1.74233             |

| Lipid Name        | P value  | Mean Change (db/db) |
|-------------------|----------|---------------------|
| PS 40:8           | 6.51E-07 | 1.74073             |
| DAG 36:0          | 6.64E-07 | 1.74000             |
| Plasmenyl-PE 40:6 | 8.21E-07 | 1.73452             |
| PE 44:3           | 8.34E-07 | 1.73359             |
| PC 38:4           | 8.34E-07 | 1.73377             |
| TAG 52:4          | 9.42E-07 | 1.73024             |
| PE 32:1           | 9.57E-07 | 1.72959             |
| FFA 16:0          | 9.64E-07 | 1.72915             |
| TAG 48:0          | 1.07E-06 | -1.72591            |
| DAG 38:4          | 1.07E-06 | 1.72602             |
| Plasmenyl-PE 40:1 | 1.30E-06 | -1.72048            |
| lysoPC 16:1       | 1.30E-06 | -1.72038            |
| Plasmenyl-PE 36:2 | 1.36E-06 | 1.71884             |
| DAG 40:7          | 1.39E-06 | 1.71804             |
| lysoPE 22:1       | 1.39E-06 | -1.71769            |
| DAG 32:2          | 1.43E-06 | 1.71671             |
| FFA 18:0          | 1.48E-06 | 1.71522             |
| PG 34:0           | 1.48E-06 | 1.71533             |
| TAG 58:5          | 1.65E-06 | 1.71209             |
| TAG 56:3          | 1.84E-06 | 1.70843             |
| PC 38:7           | 1.84E-06 | 1.70852             |
| lysoPE 20:1       | 2.01E-06 | -1.70575            |
| PC 38:1           | 2.23E-06 | 1.70245             |
| PE 42:9           | 2.68E-06 | 1.69686             |
| TAG 58:1          | 2.70E-06 | 1.69638             |
| TAG 60:6          | 2.81E-06 | 1.69493             |
| PE 34:1           | 2.83E-06 | 1.69443             |
| PE 38:3           | 3.33E-06 | 1.68927             |
| PE 38:7           | 3.39E-06 | 1.68844             |
| TAG 46:0          | 3.43E-06 | -1.68789            |
| lysoPE 16:1       | 3.45E-06 | -1.68745            |
| TAG 58:6          | 3.96E-06 | 1.68285             |
| PC 42:10          | 4.50E-06 | 1.67860             |
| PC 40:3           | 5.37E-06 | 1.67263             |
| DAG 30:0          | 6.13E-06 | 1.66799             |
| lysoPC 20:1       | 6.88E-06 | -1.66386            |
| lysoPC 26:0       | 7.38E-06 | 1.66118             |
| PI 36:1           | 8.17E-06 | 1.65742             |
| TAG 56:0          | 8.28E-06 | 1.65672             |
| PC 46:5           | 9.00E-06 | 1.65353             |
| TAG 60:12         | 9.27E-06 | 1.65223             |
| lysoPC 18:1       | 9.38E-06 | -1.65101            |
| PC 30:0           | 9.38E-06 | 1.65121             |
| PC 38:3           | 9.38E-06 | 1.65131             |
| DAG 42:10         | 9.55E-06 | 1.65011             |
| PE 34:3           | 9.80E-06 | 1.64892             |
| SM 36:2           | 1.16E-05 | 1.64265             |
| TAG 54:0          | 1.16E-05 | 1.64227             |

| Lipid Name        | P value    | Mean Change (db/db) |
|-------------------|------------|---------------------|
| Plasmenyl-PE 36:5 | 1.37E-05   | 1.63548             |
| DAG 32:3          | 1.37E-05   | 1.63560             |
| DAG 38:5          | 1.37E-05   | 1.63582             |
| DAG 34:4          | 1.39E-05   | 1.63452             |
| PE 42:1           | 1.53E-05   | 1.63072             |
| PC 40:8           | 1.56E-05   | 1.62971             |
| TAG 58:7          | 1.95E-05   | 1.62079             |
| DAG 40:8          | 2.54E-05   | 1.60984             |
| FFA 18:1          | 2.55E-05   | 1.60953             |
| PE 42:8           | 2.89E-05   | 1.60404             |
| FFA 18:2          | 2.89E-05   | 1.60376             |
| PS 38:6           | 2.98E-05   | 1.60229             |
| SM 40:2           | 2.99E-05   | 1.60185             |
| PE 36:5           | 3.08E-05   | 1.60031             |
| PE 40:9           | 3.46E-05   | 1.59505             |
| FFA 20:2          | 3.52E-05   | 1.59403             |
| PS 36:4           | 3.84E-05   | 1.59010             |
| PE 42:5           | 4.51E-05   | 1.58274             |
| lysoPC 18:0       | 6.17E-05   | 1.56826             |
| PC 36:5           | 6.54E-05   | 1.56523             |
| PE 40:4           | 7.75E-05   | 1.55691             |
| PI 34:2           | 9.47E-05   | 1.54694             |
| lysoPC 24:0       | 0.00010099 | 1.54344             |
| PE 40:8           | 0.00010794 | 1.53982             |
| PC 40:9           | 0.00011742 | 1.53527             |
| PE 40:1           | 0.00013333 | 1.52846             |
| PC 42:2           | 0.0001382  | 1.52629             |
| PG 40:8           | 0.00015168 | 1.52111             |
| PC 32:4           | 0.00015581 | 1.51907             |
| CL 74:5           | 0.00015581 | 1.51911             |
| DAG 40:2          | 0.00015904 | 1.51767             |
| PC 32:0           | 0.00017874 | 1.51110             |
| DAG 40:3          | 0.00019841 | 1.50510             |
| FFA 20:0          | 0.00021649 | 1.49997             |
| DAG 40:5          | 0.00023452 | 1.49518             |
| lysoPC 18:2       | 0.00026216 | 1.48853             |
| CL 82:1           | 0.00026341 | 1.48794             |
| TAG 46:3          | 0.00026715 | 1.48681             |
| PE 42:2           | 0.00029498 | 1.48075             |
| lysoPC 22:0       | 0.00034246 | 1.47163             |
| PG 44:12          | 0.00035542 | 1.46908             |
| TAG 62:14         | 0.00042657 | 1.45767             |
| PC 34:1           | 0.00046904 | 1.45144             |
| PS 36:1           | 0.00047871 | 1.44983             |
| lysoPC 22:6       | 0.00064407 | 1.43047             |
| lysoPC 22:5       | 0.00067489 | 1.42704             |
| SM 40:1           | 0.00067742 | 1.42644             |
| TAG 60:8          | 0.00069164 | 1.42472             |

| Lipid Name                  | P value    | Mean Change ( <i>db/db</i> ) |
|-----------------------------|------------|------------------------------|
| PE 44:2                     | 0.0007028  | 1.42330                      |
| Arachidonic acid (FFA 20:4) | 0.00073726 | 1.41976                      |
| PI 34:1                     | 0.00086724 | 1.40802                      |
| PS 42:7                     | 0.00086724 | 1.40828                      |
| PE 44:11                    | 0.0008873  | 1.40609                      |
| lysoPE 24:4                 | 0.00090071 | -1.40434                     |
| TAG 50:1                    | 0.00090071 | 1.40455                      |
| TAG 44:2                    | 0.00094681 | 1.40052                      |
| TAG 40:0                    | 0.00094699 | 1.40015                      |
| PS 44:11                    | 0.00095909 | 1.39891                      |
| TAG 62:13                   | 0.00105867 | 1.39157                      |
| SM 34:2                     | 0.0010796  | 1.38982                      |
| TAG 62:6                    | 0.00110436 | 1.38784                      |
| DAG 38:2                    | 0.00118878 | 1.38217                      |
| SM 40:0                     | 0.00132057 | 1.37411                      |
| TAG 56:4                    | 0.0014089  | 1.36894                      |
| Plasmenyl-PE 38:3           | 0.00150967 | 1.36339                      |
| Plasmenyl-PE 38:1           | 0.00185708 | -1.34714                     |
| PS 34:0                     | 0.0019724  | 1.34204                      |
| CL 70:5                     | 0.0020662  | 1.33799                      |
| PS 40:1                     | 0.00213267 | 1.33509                      |
| PC 44:5                     | 0.00222744 | 1.33084                      |
| PC 38:8                     | 0.00222744 | 1.33104                      |
| FFA 24:3                    | 0.00227288 | 1.32884                      |
| TAG 62:7                    | 0.00237835 | 1.32478                      |
| DAG 28:2                    | 0.00252013 | 1.31966                      |
| PA 34:0                     | 0.00276955 | 1.31146                      |
| PE 40:10                    | 0.00284602 | 1.30841                      |
| PS 40:2                     | 0.00284602 | 1.30875                      |
| PS 38:3                     | 0.00301273 | 1.30283                      |
| TAG 62:12                   | 0.00301273 | 1.30284                      |
| PS 38:1                     | 0.0030726  | 1.30077                      |
| PG 38:7                     | 0.00324449 | 1.29572                      |
| FFA 20:1                    | 0.003483   | 1.28920                      |
| Plasmenyl-PE 40:3           | 0.00358244 | 1.28635                      |
| PA 40:6                     | 0.00373124 | 1.28239                      |
| lysoPC 26:1                 | 0.00379083 | 1.28021                      |
| PG 40:6                     | 0.00379083 | 1.28047                      |
| PE 42:3                     | 0.00383139 | 1.27887                      |
| TAG 50:4                    | 0.00387915 | 1.27739                      |
| PC 44:3                     | 0.00388192 | 1.27693                      |
| PG 36:3                     | 0.00391695 | -1.27575                     |
| FFA 24:1                    | 0.00412609 | -1.27070                     |
| PG 38:4                     | 0.00437931 | 1.26492                      |
| PG 40:7                     | 0.00439375 | 1.26423                      |
| Plasmenyl-PE 42:6           | 0.00439754 | 1.26376                      |
| PC 18:0                     | 0.00452707 | 1.26033                      |
| PE 38:5                     | 0.00452707 | 1.26045                      |

| Lipid Name  | P value    | Mean Change ( <i>db/db</i> ) |
|-------------|------------|------------------------------|
| SM 42:5     | 0.0052948  | 1.24538                      |
| PC 44:10    | 0.00539616 | 1.24320                      |
| PS 42:2     | 0.00552378 | 1.24059                      |
| DAG 38:1    | 0.0056464  | 1.23810                      |
| DAG 38:7    | 0.0057642  | 1.23573                      |
| PG 42:10    | 0.00586016 | 1.23375                      |
| lysoPC 14:0 | 0.00652943 | -1.22286                     |
| PC 32:1     | 0.00659485 | 1.22069                      |
| DAG 38:0    | 0.00659485 | 1.22086                      |
| PS 46:6     | 0.00659485 | 1.22120                      |
| TAG 60:9    | 0.00696456 | 1.21490                      |
| PA 34:1     | 0.00701159 | 1.21383                      |
| lysoPC 22:1 | 0.00701237 | -1.21342                     |
| PS 38:2     | 0.00754344 | 1.20571                      |
| PC 46:2     | 0.0075621  | -1.20506                     |
| PA 38:4     | 0.00844056 | 1.19345                      |
| SM 30:1     | 0.0085969  | 1.19115                      |
| PI 38:3     | 0.00893498 | -1.18633                     |
| PC 36:6     | 0.00893498 | 1.18663                      |
| PC 38:5     | 0.0089512  | 1.18533                      |
| PE 36:6     | 0.0089512  | 1.18544                      |

Value given as mean difference in 24-week-old *db/db* versus *db/+*. CL = cardiolipin, DAG = diacylglycerol, FFA = free fatty acid, PA = phosphatidic acid, PC = phosphatidylcholine, PE = phosphatidylethanolamine, PG = phosphatidylglycerol, PI = phosphatidylinositol, PS = phosphatidylserine, SM = sphingomyelin, TAG = triacylglycerol.  $P < 0.01$  based on a two-sample t-test with FDR correction,  $n = 10/\text{group}$ . Related to Figure 1.

**Supplemental Table S4: Significantly different lipid features in between control and diabetic mouse retina**

| Lipid Name                  | P value    | Mean Change ( <i>db/db</i> ) |
|-----------------------------|------------|------------------------------|
| lysoPC 22:6                 | 2.22E-07   | -1.84000                     |
| PS 34:0                     | 2.60E-07   | -1.82885                     |
| lysoPC 20:1                 | 8.18E-07   | -1.80549                     |
| FFA 18:2                    | 3.45E-06   | -1.77388                     |
| PE 40:9                     | 7.33E-06   | 1.75289                      |
| FFA 20:2                    | 1.57E-05   | -1.73011                     |
| lysoPC 16:0                 | 2.02E-05   | -1.71942                     |
| lysoPC 22:5                 | 5.96E-05   | -1.68416                     |
| lysoPC 18:1                 | 6.61E-05   | -1.67714                     |
| SM 36:2                     | 9.90E-05   | 1.66023                      |
| lysoPC 20:4                 | 0.0001004  | -1.65343                     |
| lysoPE 22:6                 | 0.0001004  | -1.65582                     |
| DAG 40:6                    | 0.00010722 | -1.64771                     |
| FFA 20:1                    | 0.00010722 | -1.64559                     |
| Plasmenyl-PE 34:1           | 0.00012311 | -1.63799                     |
| DAG 38:6                    | 0.00015057 | -1.62795                     |
| DAG 36:1                    | 0.00016034 | -1.62316                     |
| CL 72:1                     | 0.00016217 | -1.61911                     |
| Plasmenyl-PE 36:4           | 0.00016217 | 1.61834                      |
| PG 32:0                     | 0.00016241 | -1.61624                     |
| PS 36:1                     | 0.00017431 | -1.61143                     |
| PE 42:9                     | 0.00018058 | 1.60809                      |
| PC 36:4                     | 0.00035495 | 1.57710                      |
| PE 30:0                     | 0.0004722  | -1.56198                     |
| DAG 36:2                    | 0.00053181 | -1.54308                     |
| DAG 38:5                    | 0.00053181 | -1.54754                     |
| DAG 44:12                   | 0.00053181 | -1.54297                     |
| PC 18:0                     | 0.00053181 | -1.54229                     |
| PE 34:2                     | 0.00053181 | -1.54510                     |
| PG 36:2                     | 0.00053181 | -1.54390                     |
| PG 38:4                     | 0.00053181 | -1.55085                     |
| Plasmenyl-PE 36:1           | 0.00053181 | -1.54359                     |
| PC 36:6                     | 0.0008485  | -1.51664                     |
| Plasmenyl-PE 34:0           | 0.00085062 | -1.51491                     |
| Arachidonic acid (FFA 20:4) | 0.00093821 | -1.50805                     |
| PS 36:2                     | 0.00098676 | -1.50374                     |
| Plasmenyl-PE 32:0           | 0.00136863 | -1.48373                     |
| SM 38:1                     | 0.00168063 | -1.47008                     |
| MAG 18:1                    | 0.00173429 | 1.46663                      |
| CL 74:3                     | 0.00199804 | -1.45492                     |
| DAG 36:5                    | 0.00199804 | -1.45552                     |
| DAG 40:7                    | 0.00220425 | -1.44728                     |
| FFA 18:1                    | 0.00220504 | -1.44577                     |
| PS 36:4                     | 0.00242422 | 1.43826                      |
| Plasmenyl-PE 36:5           | 0.00243739 | -1.43646                     |

| Lipid Name        | P value    | Mean Change ( <i>db/db</i> ) |
|-------------------|------------|------------------------------|
| FFA 22:3          | 0.00252388 | -1.43277                     |
| PE 38:1           | 0.00255964 | -1.43044                     |
| PE 42:10          | 0.00265253 | 1.42672                      |
| DAG 34:1          | 0.00294049 | -1.41848                     |
| DAG 40:5          | 0.00313145 | -1.41285                     |
| Plasmenyl-PE 40:5 | 0.0039436  | -1.39549                     |
| lysoPC 16:1       | 0.00502859 | -1.37659                     |
| SM 34:2           | 0.00545568 | 1.36914                      |
| DAG 34:0          | 0.00654437 | -1.35125                     |
| DAG 34:2          | 0.00654437 | -1.35389                     |
| lysoPC 18:2       | 0.00654437 | -1.35114                     |
| PC 40:6           | 0.00708678 | 1.34356                      |
| PE 32:1           | 0.00728405 | -1.34003                     |
| DAG 32:0          | 0.00940724 | -1.31675                     |
| lysoPC 20:2       | 0.00940724 | -1.31661                     |
| DAG 38:3          | 0.00967331 | -1.31292                     |

Value given as mean difference in 24-week-old *db/db* versus *db/+*. CL = cardiolipin, DAG = diacylglycerol, FFA = free fatty acid, MAG = monoacylglycerol, PC = phosphatidylcholine, PE = phosphatidylethanolamine, PG = phosphatidylglycerol, PS = phosphatidylserine, SM = sphingomyelin. P < 0.01 based on a two-sample t-test with FDR correction, n = 10/group. Related to Figure 1.



**Supplemental Table S5: Summary of significant class-level lipid changes in diabetic tissues**

| Lipid Class  | Kidney                                                         | Nerve                                              | Retina                                      |
|--------------|----------------------------------------------------------------|----------------------------------------------------|---------------------------------------------|
| CE           | Increased                                                      | NS                                                 | NS                                          |
| CerP         | NS                                                             | NS                                                 | NS                                          |
| CL           | Increased short- and medium-chain, decreased long-chain        | Increased                                          | Decreased                                   |
| DAG          | Mostly increased                                               | Increased                                          | Decreased                                   |
| FFA          | ND                                                             | Mostly increased                                   | Decreased                                   |
| lysoPC       | Increased short-chain, decreased long-chain                    | Mostly decreased short-chain, increased long-chain | Decreased                                   |
| lysoPE       | Increased short-chain, decreased long-chain                    | Decreased                                          | Decreased                                   |
| MAG          | Increased                                                      | NS                                                 | Increased                                   |
| PA           | Increased short-chain, decreased long-chain                    | Increased                                          | NS                                          |
| PC           | Decreased short- and medium-chain, mostly increased long-chain | Mostly increased                                   | Mix                                         |
| PE           | Decreased short-chain, mostly increased medium- and long-chain | Increased                                          | Decreased short-chain, increased long-chain |
| PG           | Mostly decreased                                               | Mostly increased                                   | NS                                          |
| PI           | Mostly decreased                                               | Mostly increased                                   | NS                                          |
| Plasmenyl-PC | Increased                                                      | NS                                                 | NS                                          |
| Plasmenyl-PE | Mostly increased, saturated decreased                          | Mostly increased, monounsaturated decreased        | Mostly decreased                            |
| PS           | Increased                                                      | Increased                                          | Mostly decreased                            |
| SM           | Mostly increased                                               | Increased                                          | Mix                                         |
| TAG          | Increased                                                      | Mostly increased                                   | NS                                          |

Trends in significantly different lipid features per class in 24-week-old *db/db* versus *db/+* mice. ND = not determined, NS = no significant lipids, CE = cholesterol ester, CerP = ceramide-1-phosphate, CL = cardiolipin, DAG = diacylglycerol, FFA = free fatty acid, MAG = monoacylglycerol, PA = phosphatidic acid, PC = phosphatidylcholine, PE = phosphatidylethanolamine, PG = phosphatidylglycerol, PI = phosphatidylinositol, PS = phosphatidylserine, SM = sphingomyelin, TAG = triacylglycerol.  $P < 0.01$  based on a two-sample t-test with FDR correction,  $n = 10/\text{group}$ . Related to Table 2.

**Supplemental Table S6: Acyl chain length sub-groups of shared lipid features**

| Lipid Class | Acyl-chain lengths detected | Bottom (number of carbons) | Middle (number of carbons) | Top (number of carbons) |
|-------------|-----------------------------|----------------------------|----------------------------|-------------------------|
| CE          | 16-22                       | 16                         | 18, 20                     | 22                      |
| CerP        | 34                          | Not split                  |                            |                         |
| CL          | 68-80                       | 68, 70                     | 72, 74, 76                 | 78, 80                  |
| DAG         | 30-42                       | 30, 32                     | 34, 36, 38                 | 40, 42                  |
| lysoPC      | 14-26                       | 14, 16                     | 18, 20, 22                 | 24, 26                  |
| lysoPE      | 16-24                       | 16, 18                     | 20                         | 22, 24                  |
| MAG         | 16-18                       | Not split                  |                            |                         |
| PA          | 34-38                       | 34                         | 36                         | 38                      |
| PC          | 18-46                       | 18, 20, 22, 24*, 26*       | 28, 30, 32, 34, 36         | 38, 40, 42, 44, 46      |
| PE          | 30-42                       | 30, 32                     | 34, 36, 38                 | 40, 42                  |
| PG          | 32-44                       | 32, 34                     | 36, 38, 40                 | 42*, 44                 |
| PI          | 34-40                       | 34                         | 36, 38                     | 40                      |
| PlasmenylPC | 18, 24, 44                  | Not split                  |                            |                         |
| PlasmenylPE | 32-42                       | 32, 34                     | 36, 38                     | 40, 42                  |
| PS          | 38-42                       | Not split                  |                            |                         |
| SM          | 30-44                       | 30, 32, 34                 | 36, 38                     | 40, 42, 44              |
| TAG         | 40-66                       | 40, 42, 44, 46, 48         | 50, 52, 54, 56             | 58, 60, 62, 64, 66      |

CE = cholesterol ester, CerP = ceramide-1-phosphate, CL = cardiolipin, DAG = diacylglycerol, MAG = monoacylglycerol, PA = phosphatidic acid, PC = phosphatidylcholine, PE = phosphatidylethanolamine, PG = phosphatidylglycerol, PI = phosphatidylinositol, PS = phosphatidylserine, SM = sphingomyelin, TAG = triacylglycerol. Lipid classes were not split into sub-groups if there were less 2 lipid features in 2 or more sub-groups (bottom, middle, and top). \*Not included in analysis as not present in all tissues. Related to Methods, Table 3, and Tables S7-S8.

**Supplemental Table S7: Commonly co-regulated lipid sub-classes between plasma and each tissue by saturation**

| Lipid Sub-Class | Kidney  |          | Nerve   |          | Retina  |          | Liver   |          |
|-----------------|---------|----------|---------|----------|---------|----------|---------|----------|
|                 | Control | Diabetic | Control | Diabetic | Control | Diabetic | Control | Diabetic |
| CE low          |         | X        |         | X        |         | X        | X       | X        |
| CE high         |         |          |         |          | X       |          | X       |          |
| CerP low        |         |          |         |          |         |          |         |          |
| CL high         |         |          | X       |          |         |          |         |          |
| DAG low         | X       |          | X       |          |         |          | X       |          |
| DAG high        |         |          |         |          |         |          |         |          |
| LPC low         |         |          |         | X        |         |          | X       |          |
| LPC high        |         |          |         |          |         |          |         |          |
| LPE low         | X       | X        | X       | X        |         |          | X       | X        |
| LPE high        |         |          | X       |          |         | X        | X       |          |
| PA low          | X       | X        |         | X        |         |          |         | X        |
| PA high         | X       |          | X       | X        | X       | X        |         | X        |
| PC low          | X       |          |         |          |         |          |         |          |
| PC high         |         |          |         |          |         |          |         |          |
| PE low          |         |          |         |          |         |          |         |          |
| PE high         |         |          |         |          |         |          |         |          |
| PG low          |         | X        |         | X        | X       | X        | X       | X        |
| PG high         |         |          |         |          | X       |          | X       |          |
| PI high         |         |          |         |          |         |          |         |          |
| PI low          |         |          |         |          |         |          |         |          |
| PIPC low        |         |          |         |          |         |          |         |          |
| PIPE low        |         |          |         |          | X       |          | X       |          |
| PIPE high       |         |          |         | X        |         |          |         |          |
| PS high         |         |          |         |          |         |          |         |          |
| SM low          |         |          |         |          |         |          | X       |          |
| SM high         |         | X        |         |          |         |          |         |          |
| TAG low         |         |          |         |          |         |          |         |          |
| TAG high        |         |          |         |          |         |          |         |          |
| Total:          | 5       | 5        | 5       | 7        | 5       | 4        | 10      | 5        |

Commonly co-regulated (“X”) lipid sub-classes between plasma and each tissue in 24-week-old *db/db* (diabetic) and *db/+* (control) mice. CE = cholesterol ester, CerP = ceramide-1-phosphate, CL = cardiolipin, DAG = diacylglycerol, PA = phosphatidic acid, PC = phosphatidylcholine, PE = phosphatidylethanolamine, PG = phosphatidylglycerol, PI = phosphatidylinositol, PIPC = plasmeyl-PC, PIPE = plasmeyl-PE, PS = phosphatidylserine, SM = sphingomyelin, TAG = triacylglycerol.  $P < 0.1$  using correlation analysis at the set level,  $n = 10/\text{group}$ . Related to Table 3 and S8.

**Supplemental Table S8: Commonly co-regulated lipid sub-classes between plasma and each tissue by acyl-chain length**

| Lipid Sub-Class | Kidney  |          | Nerve   |          | Retina  |          | Liver   |          |
|-----------------|---------|----------|---------|----------|---------|----------|---------|----------|
|                 | Control | Diabetic | Control | Diabetic | Control | Diabetic | Control | Diabetic |
| CE bottom       |         |          |         |          |         |          |         |          |
| CE mid          |         |          |         |          | X       |          | X       |          |
| CE top          |         |          |         |          |         |          |         |          |
| CerP            |         |          |         |          |         |          |         |          |
| CL bottom       |         |          |         |          |         |          |         |          |
| CL mid          |         |          | X       |          |         |          |         |          |
| CL high         |         |          |         |          |         |          |         |          |
| DAG bottom      |         |          |         |          |         |          | X       |          |
| DAG mid         |         |          |         |          |         |          |         |          |
| DAG top         |         |          |         |          |         |          | X       |          |
| LPC bottom      | X       |          | X       | X        |         | X        | X       | X        |
| LPC mid         |         |          | X       |          |         |          |         |          |
| LPC top         |         |          |         |          |         |          |         |          |
| LPE bottom      |         |          | X       | X        |         | X        | X       |          |
| LPE mid         | X       |          | X       | X        |         | X        | X       |          |
| LPE top         |         | X        | X       | X        | X       | X        | X       |          |
| PA bottom       |         | X        |         | X        | X       |          |         |          |
| PA mid          | X       |          | X       | X        | X       | X        | X       |          |
| PA top          | X       |          | X       | X        | X       | X        | X       | X        |
| PC mid          |         |          |         |          |         |          |         |          |
| PC top          |         |          |         |          |         |          |         |          |
| PE bottom       |         |          | X       |          |         |          |         |          |
| PE mid          |         |          |         |          |         |          |         |          |
| PE top          |         |          |         |          |         |          |         |          |
| PG bottom       |         |          |         |          | X       |          | X       |          |
| PG mid          |         |          | X       |          | X       |          | X       |          |
| PG top          |         |          |         |          |         |          |         |          |
| PI bottom       |         |          |         |          |         |          |         |          |
| PI mid          |         |          |         |          |         |          |         |          |
| PI top          | X       | X        |         | X        |         |          | X       | X        |
| PIPC            |         |          |         |          |         |          |         |          |
| PIPE bottom     |         | X        |         |          |         |          | X       |          |
| PIPE mid        |         |          |         |          |         |          |         |          |
| PIPE top        |         |          |         |          |         |          |         |          |
| PS              |         |          |         |          |         |          |         |          |
| SM bottom       |         | X        | X       |          | X       |          |         |          |

| Lipid Sub-Class | Kidney  |          | Nerve   |          | Retina  |          | Liver   |          |
|-----------------|---------|----------|---------|----------|---------|----------|---------|----------|
|                 | Control | Diabetic | Control | Diabetic | Control | Diabetic | Control | Diabetic |
| SM mid          |         | X        |         |          | X       |          |         |          |
| SM top          |         |          |         |          |         |          |         |          |
| TAG bottom      |         |          |         |          |         |          |         |          |
| TAG mid         |         |          |         |          |         |          |         |          |
| TAG top         |         |          |         |          |         |          |         |          |
|                 |         |          |         |          |         |          |         |          |
| Total:          | 5       | 6        | 11      | 8        | 9       | 6        | 13      | 3        |

Commonly co-regulated (“X”) lipid sub-classes between plasma and each tissue in 24-week-old *db/db* (diabetic) and *db/+* (control) mice. CE = cholesterol ester, CerP = ceramide-1-phosphate, CL = cardiolipin, DAG = diacylglycerol, PA = phosphatidic acid, PC = phosphatidylcholine, PE = phosphatidylethanolamine, PG = phosphatidylglycerol, PI = phosphatidylinositol, PIPC = plasmeyl-PC, PIPE = plasmeyl-PE, PS = phosphatidylserine, SM = sphingomyelin, TAG = triacylglycerol.  $P < 0.1$  using correlation analysis at the set level,  $n = 10/\text{group}$ . Related to Table 3 and S7.

**Supplemental Table S9: Significantly different lipid correlations in diabetic kidney, nerve and retina**

| Lipids              | Kidney  |             | Nerve   |             | Retina  |             |
|---------------------|---------|-------------|---------|-------------|---------|-------------|
|                     | P value | Pearson's r | P value | Pearson's r | P value | Pearson's r |
| PE 36:5 – PE 40:6   | 0.0317  | 0.7851      | 0.0879  | 0.8699      | 0.0973  | 0.8422      |
| TAG 48:2 – TAG 50:3 | <0.0001 | 0.9665      | 0.0139  | 0.9285      | 0.0851  | 0.8493      |

Significantly correlated lipid features present in diabetic kidney, nerve and retina that were not significantly different in control kidney, nerve and retina from 24-week-old *db/+* and *db/db* mice. PE = phosphatidylethanolamine, TAG = triacylglycerol. P < 0.1 in each tissue using Pearson's correlation with Fisher's transformation and Benjamini-Hochberg FDR correction, n = 10/group. Related to Figure S3.

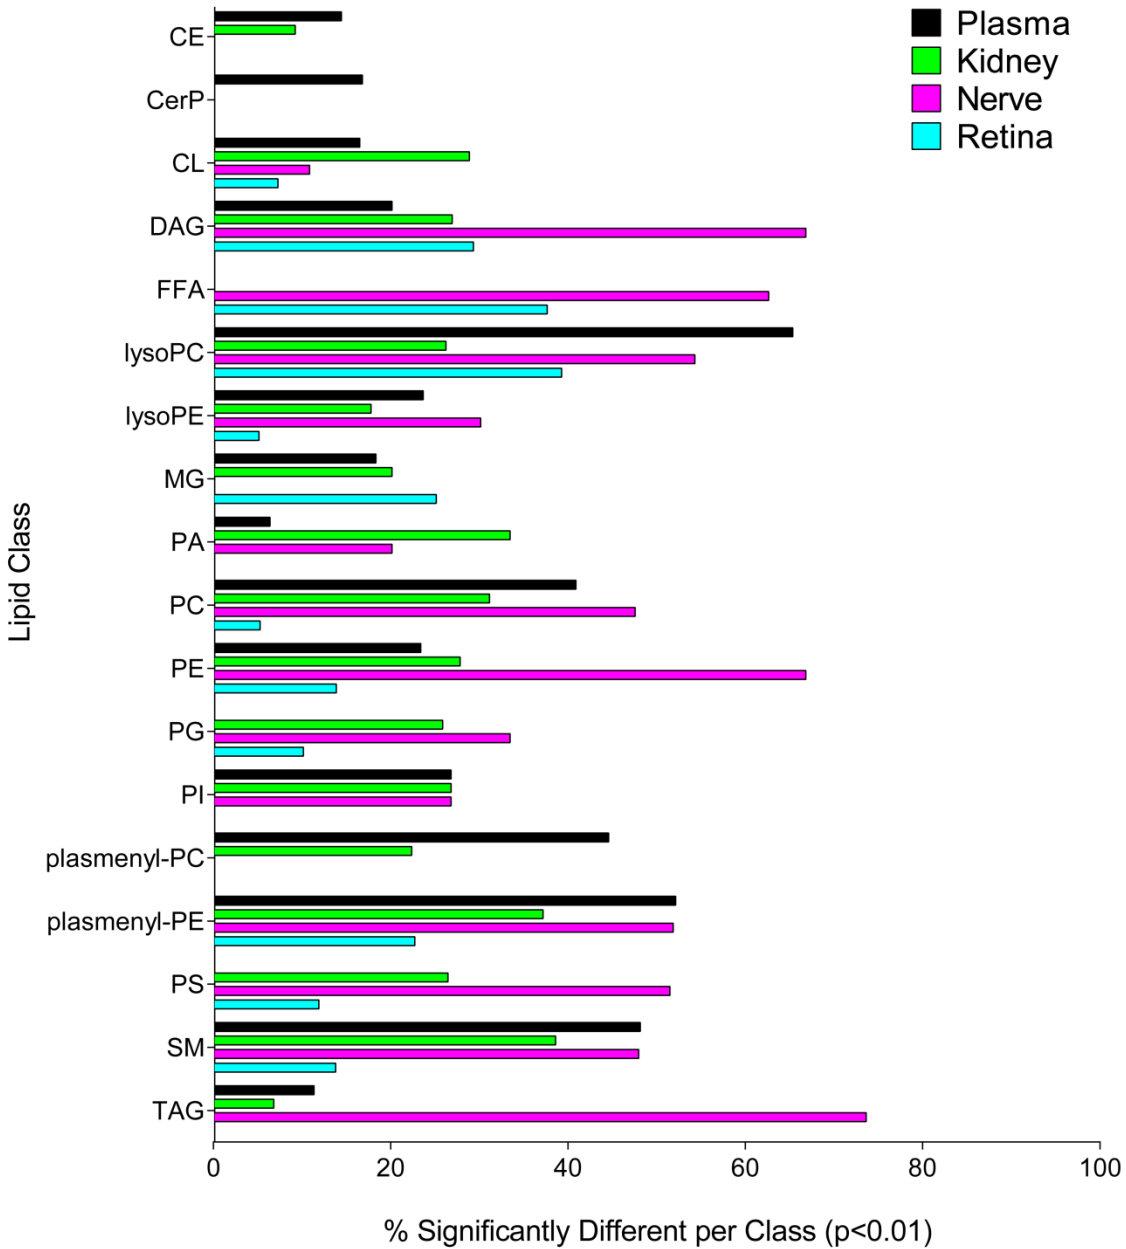

**Supplemental Figure S1: Differential lipid expression by class in diabetic plasma, kidney, nerve and retina.**

Percent of significantly different lipids per class in plasma (black), kidney (green), nerve (magenta) and retina (blue) from 24-week-old db/+ and db/db mice. CE = cholesterol ester, CerP = ceramide-1-phosphate, CL = cardiolipin, DAG = diacylglycerol, FFA = free fatty acid, MAG = monoacylglycerol, PA = phosphatidic acid, PC = phosphatidylcholine, PE = phosphatidylethanolamine, PG = phosphatidylglycerol, PI = phosphatidylinositol, PS = phosphatidylserine, SM = sphingomyelin, TAG = triacylglycerol.  $P < 0.01$  based on a two-sample t-test with FDR correction,  $n = 10$ /group. Related to Table 2.

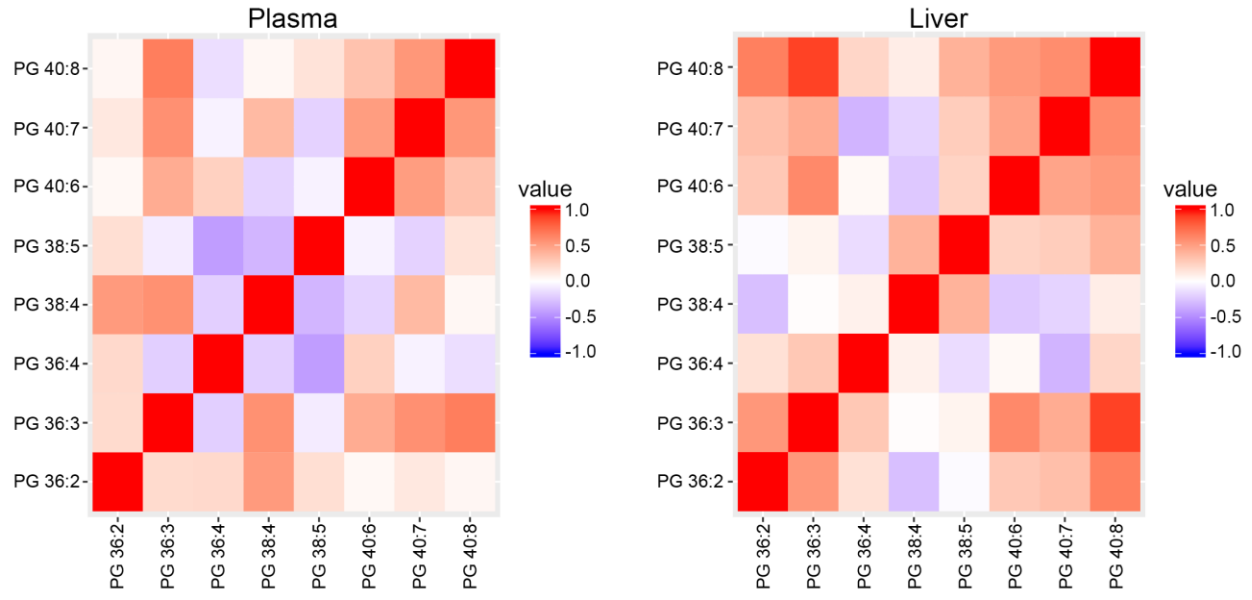

**Supplemental Figure S2: Commonly co-regulated medium acyl-chain phosphatidylglycerols between control plasma and liver.**

Lipid correlation data was analyzed at the set level to determine commonly co-expressed sub-classes of lipids. Mid acyl-chain phosphatidylglycerols (PGs) in 24-week-old control mouse plasma and liver were commonly co-expressed.  $P < 0.1$  using correlation analysis at the set level,  $n = 10/\text{group}$ . Related to Tables 3, S7-S8.



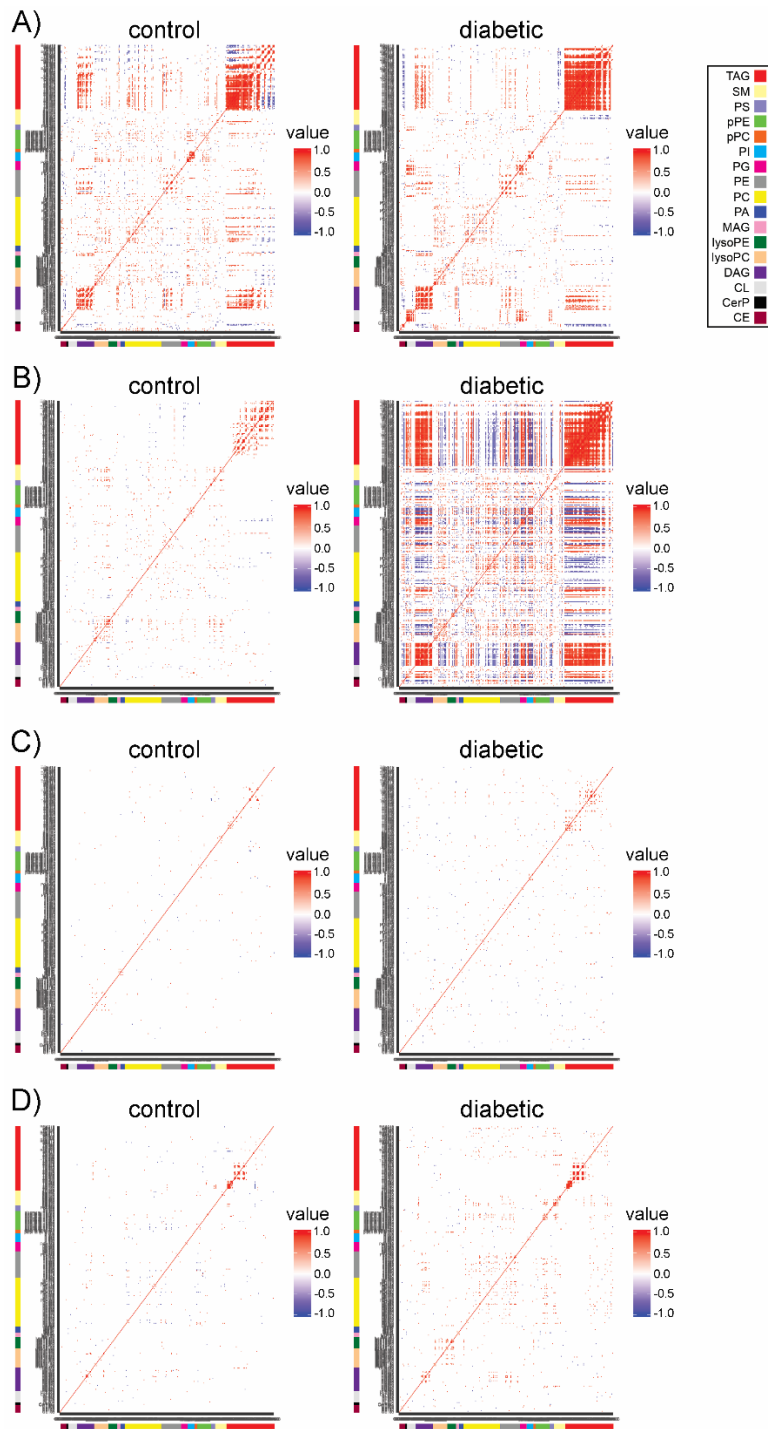

**Supplemental Figure S3: Correlation analysis of lipid features from control and diabetic mice.**

Correlation analysis of 364 shared lipid features detected in 24-week-old control and diabetic mouse (A) plasma, (B) kidney cortex, (C) sciatic nerve and (D) retina. Significant correlations are shown as positive (red) or negative (blue). The x-axis and the y-axis are identical and alphabetized by class, beginning at the origin. The color bar along each axis identifies lipids by class.  $P < 0.1$  using Pearson's correlation with Fisher's transformation and FDR correction,  $n = 10/\text{group}$ .

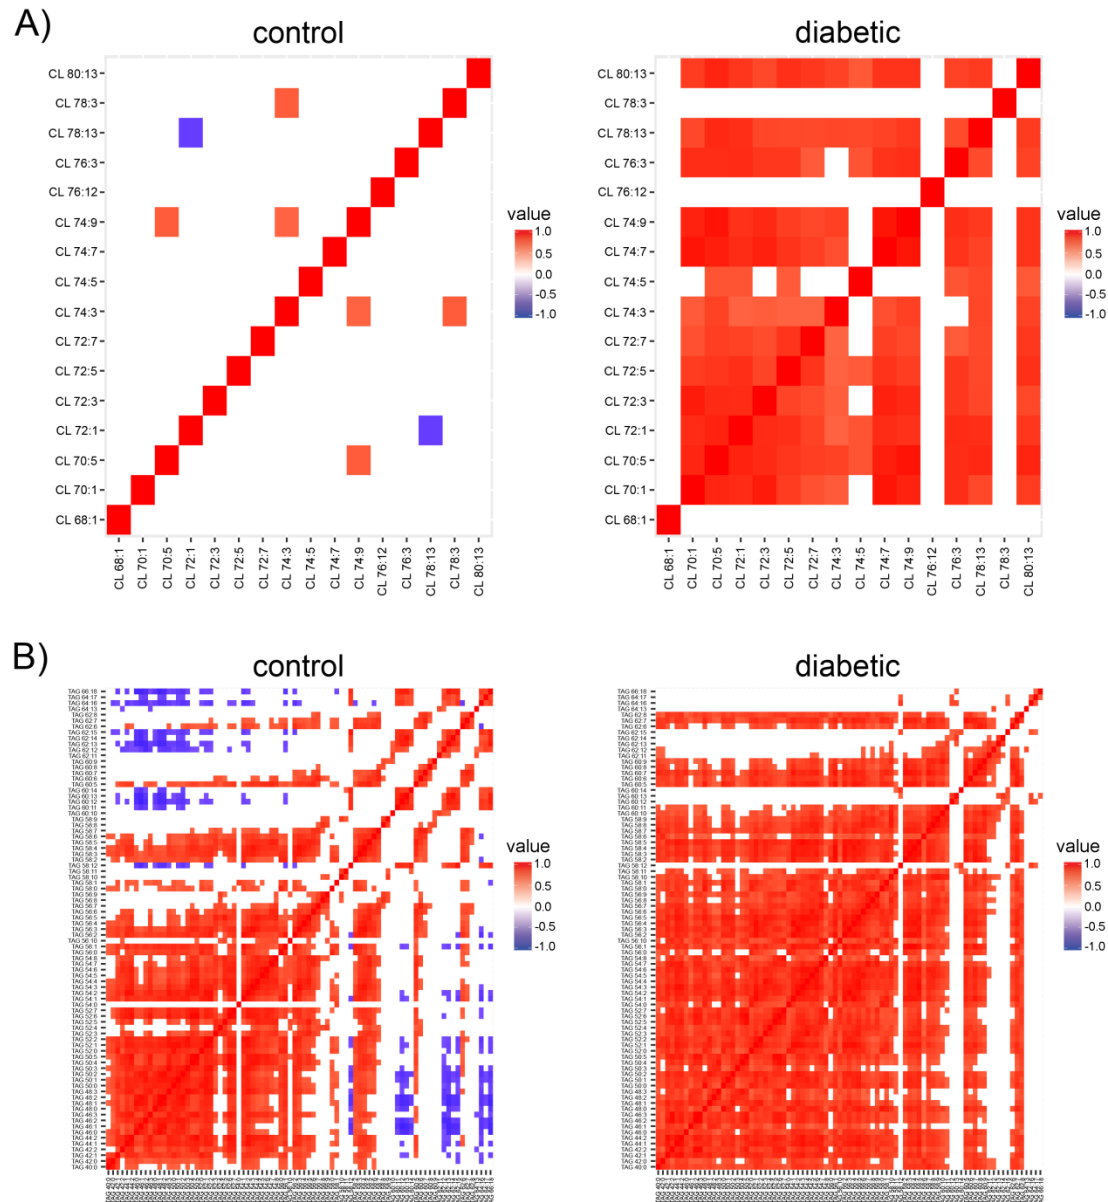

**Supplemental Figure S4: Cardiolipin and triacylglycerol correlation analyses in control and diabetic plasma.**

Zoom-in views of intra-class correlations between (A) cardiolipin (CL) and (B) triacylglycerol (TAG) lipid classes in plasma from 24-week-old control and diabetic mice. Significant correlations are shown as positive (red) or negative (blue).  $P < 0.1$  using Pearson's correlation with Fisher's transformation and FDR correction,  $n = 10/\text{group}$ . Related to Figure S3.

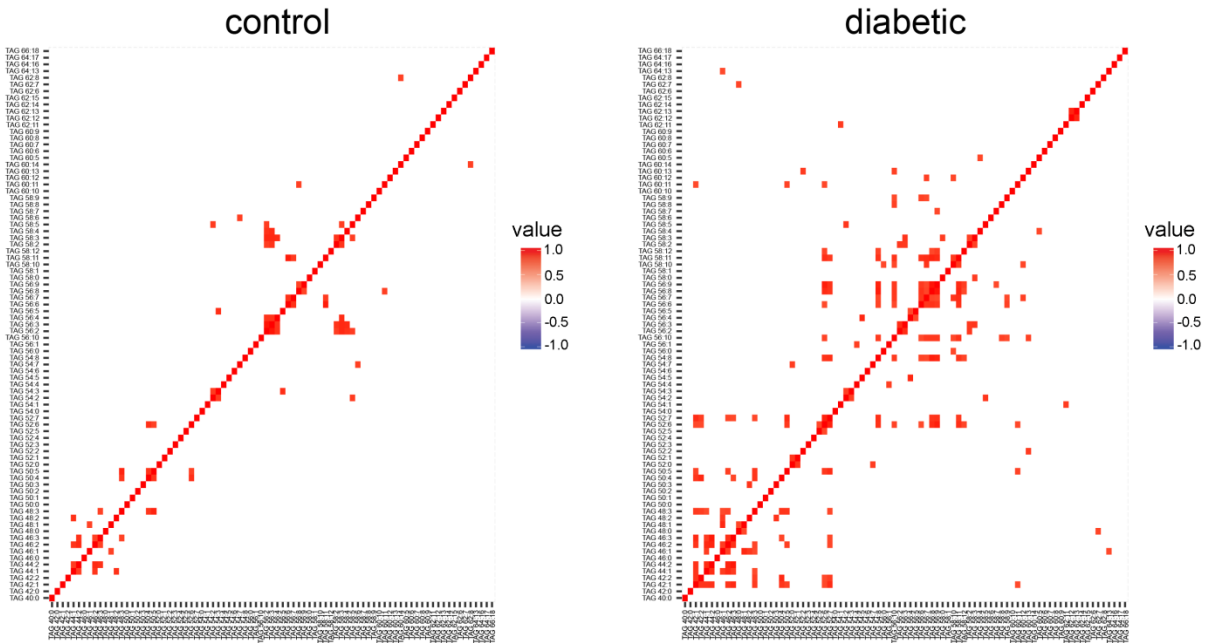

**Supplemental Figure S5: Correlation analysis of triacylglycerols in control and diabetic nerve.**

Zoom-in view of triacylglycerols (TAGs) from correlation analysis of sciatic nerve from 24-week-old control and diabetic mice. Significant correlations are shown as positive (red) or negative (blue).  $P < 0.1$  using Pearson's correlation with Fisher's transformation and FDR correction,  $n = 10/\text{group}$ . Related to Figure S3.
